# Supplementary material for: LINC01468 drives NAFLD-HCC progression through CUL4A-linked degradation of SHIP2
Source: PubMed Central journal article supplement (PMC9640567; doi:10.1038/s41420-022-01234-8), 2022-11-07

### Unprocessed WB images for Figure 1

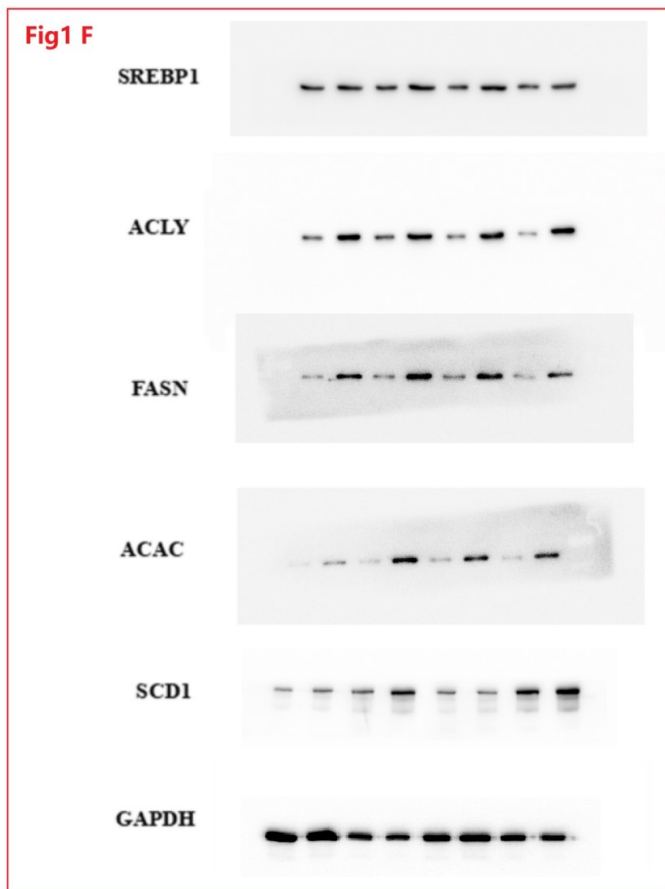

### Unprocessed WB images for Figure 3

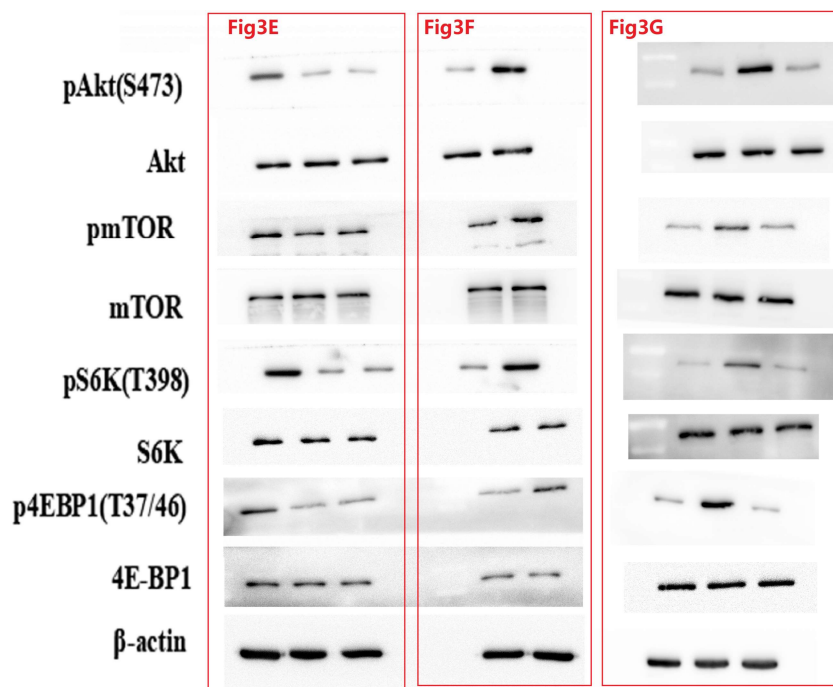

## Unprocessed WB images for Figure 4

Fig 4C

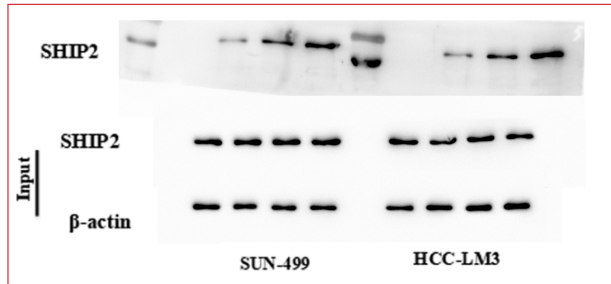

Fig4G

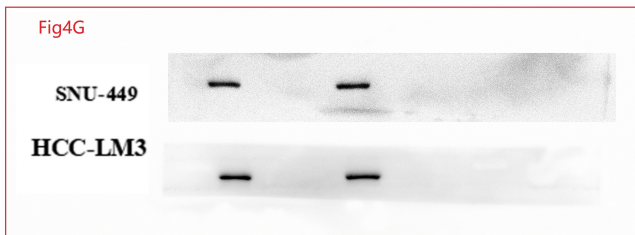

Fig4 I

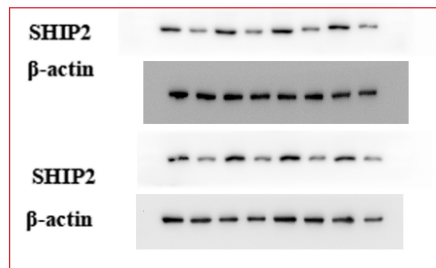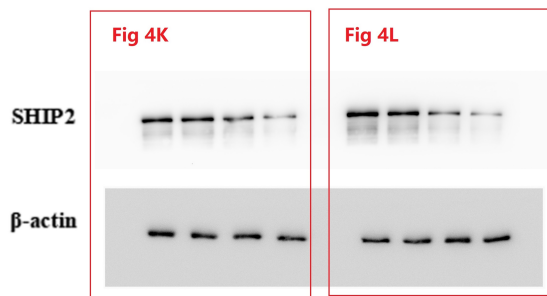

# Unprocessed WB images for Figure 5

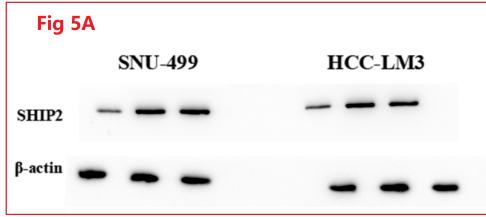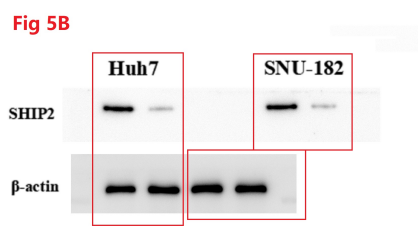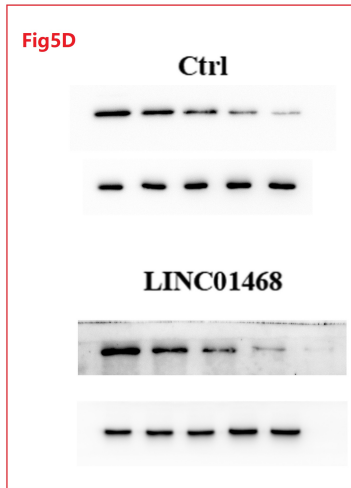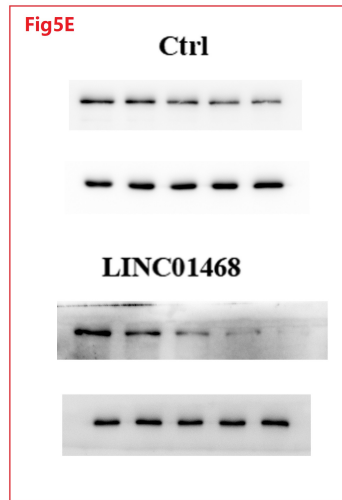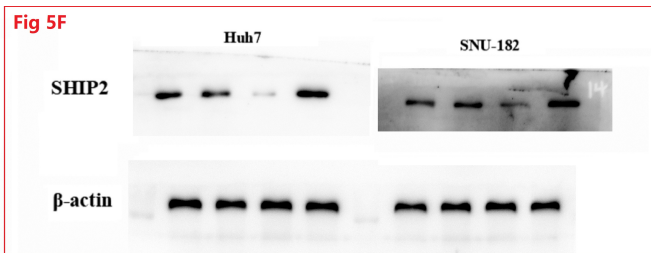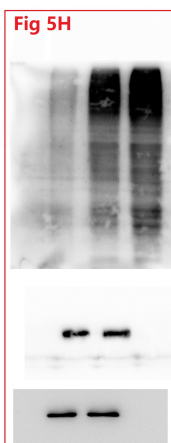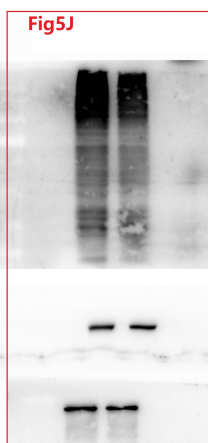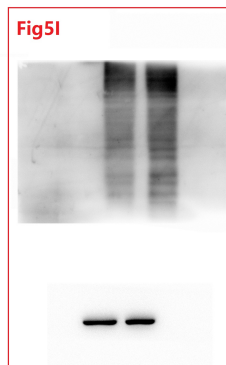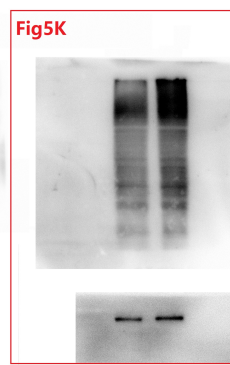

## Unprocessed WB images for Figure 6

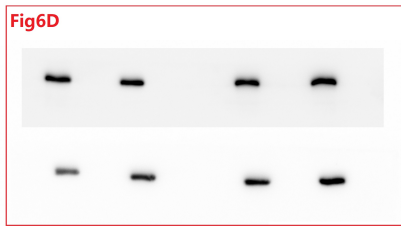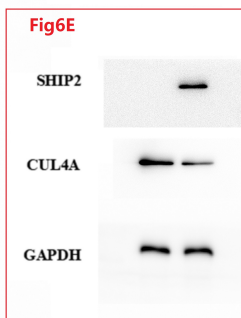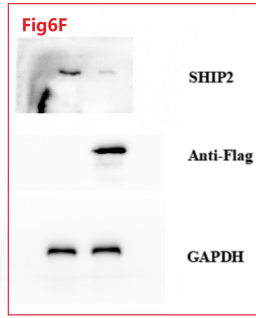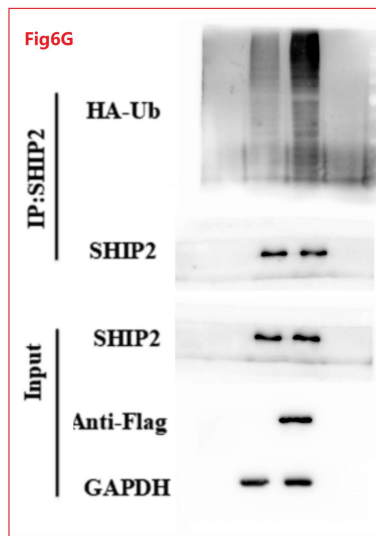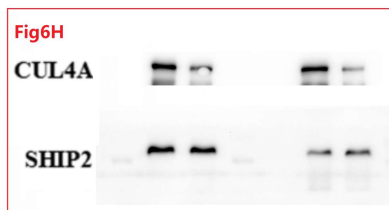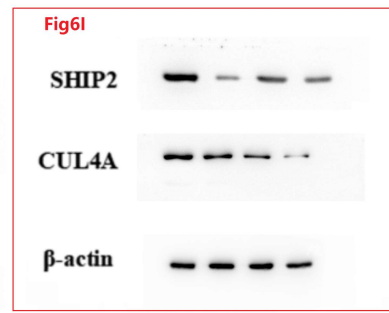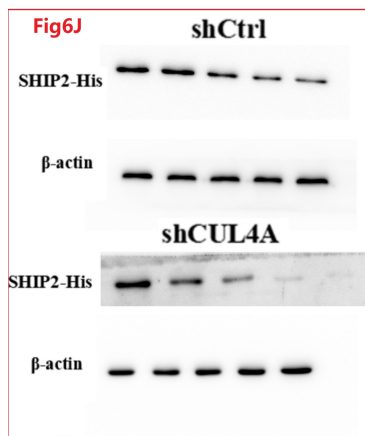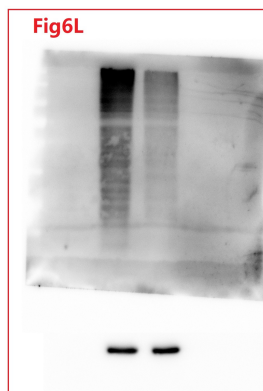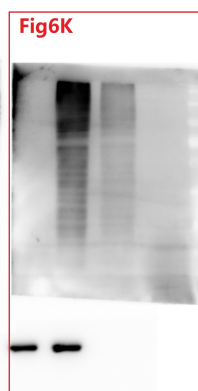

## Unprocessed WB images for Figure 7

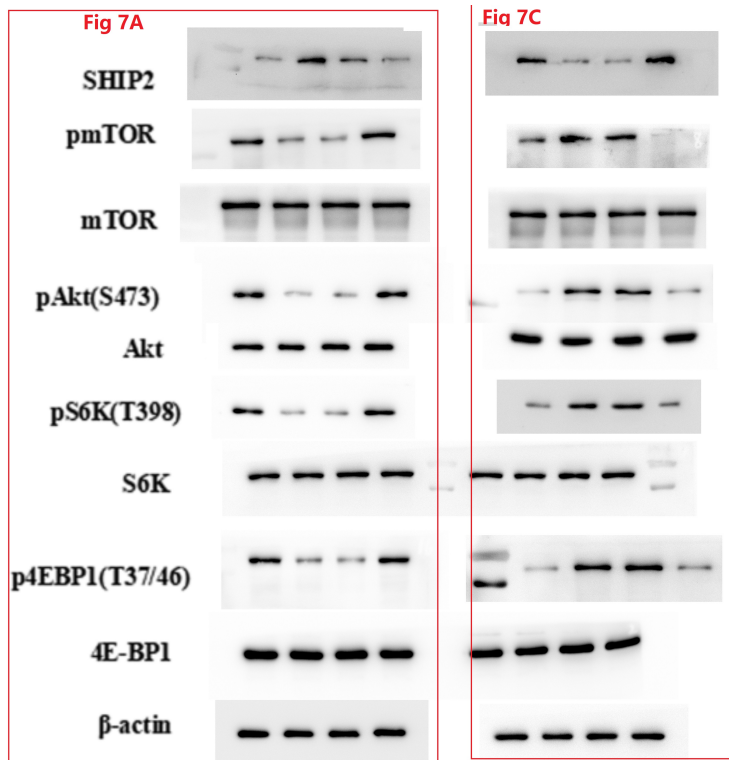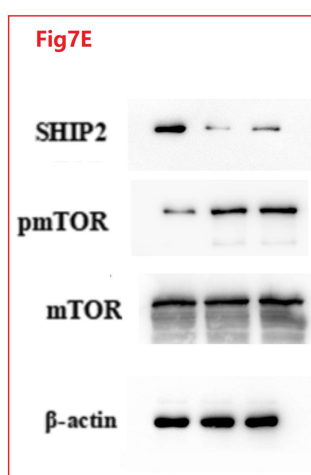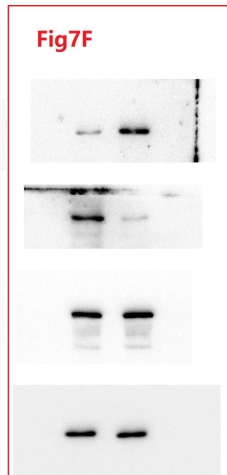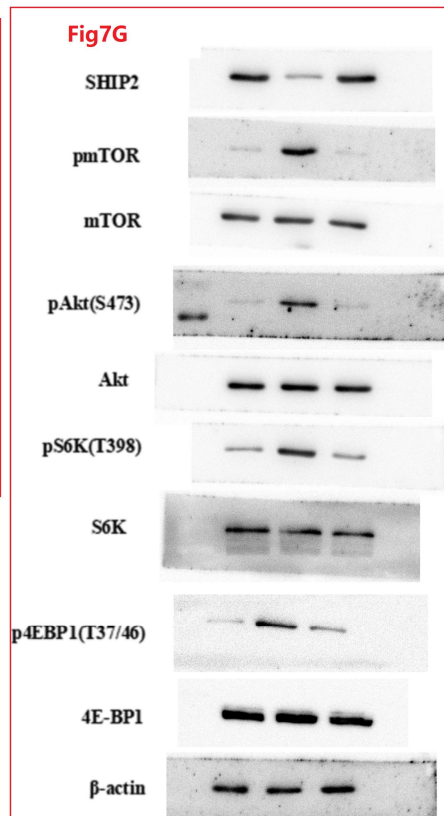

**Fig1 F**

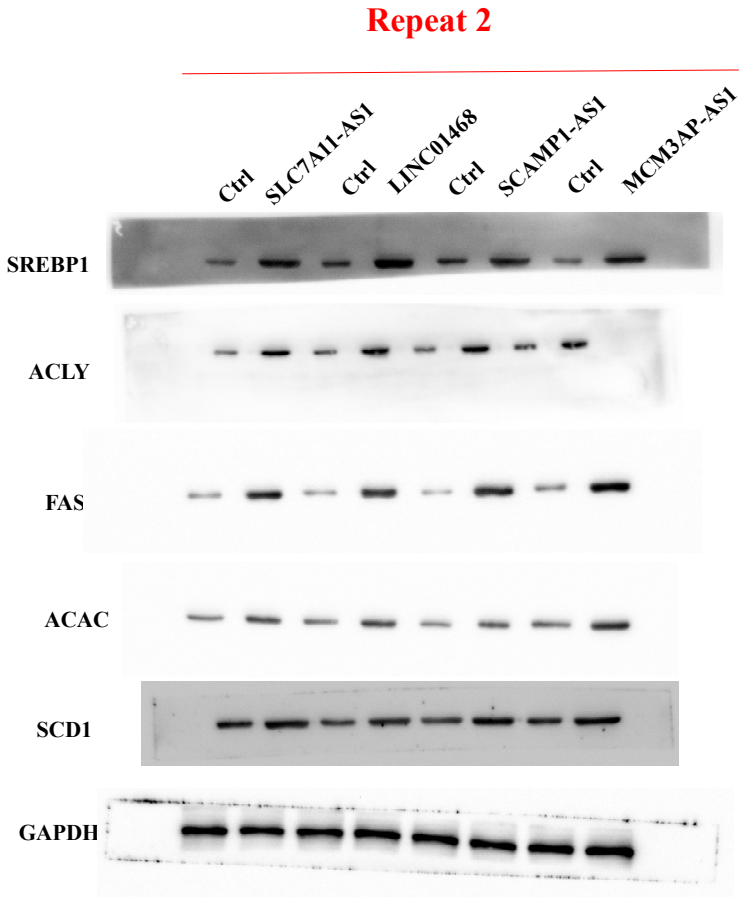

**Fig1 F**

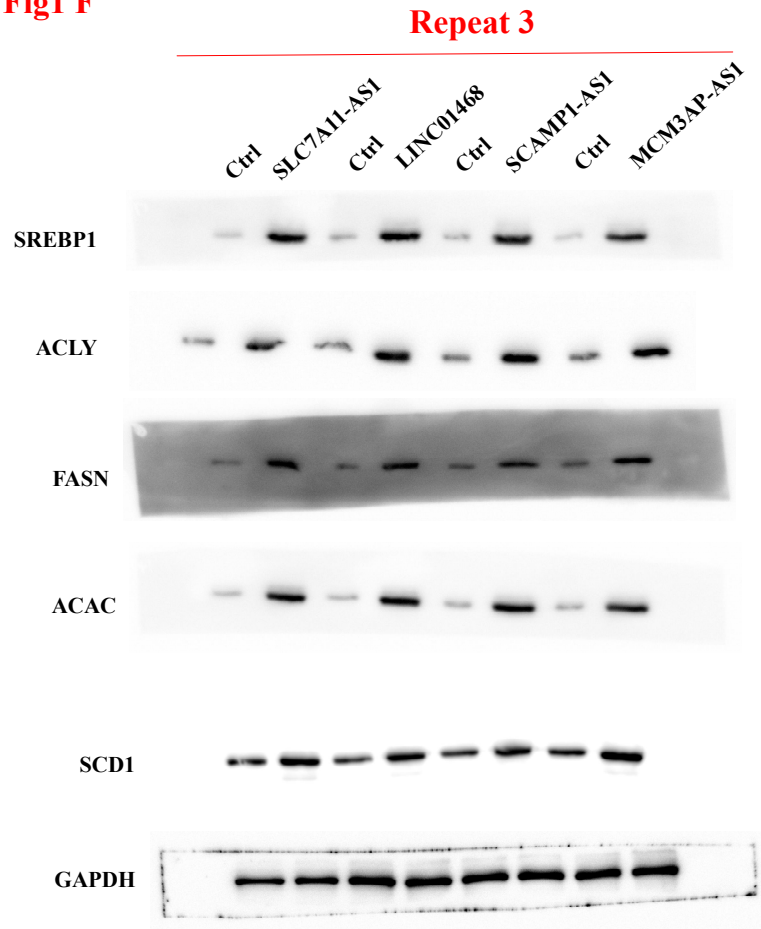

**Fig3E**

**Repeat 2**

**Repeat 3**

Ctrl  
shLINC01468 #1  
shLINC01468 #2

Ctrl  
shLINC01468 #1  
shLINC01468 #2

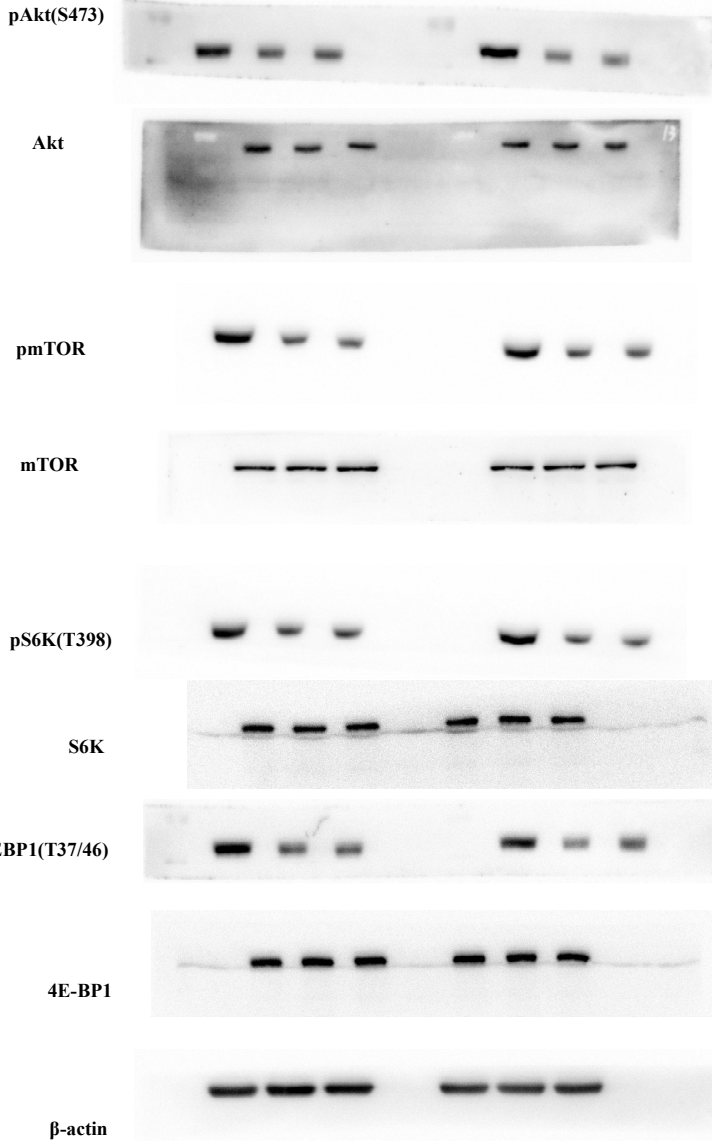

SNU-449

**Fig3F**

**Repeat 2**

**Repeat 3**

Ctrl  
LINC01468

Ctrl  
LINC01468

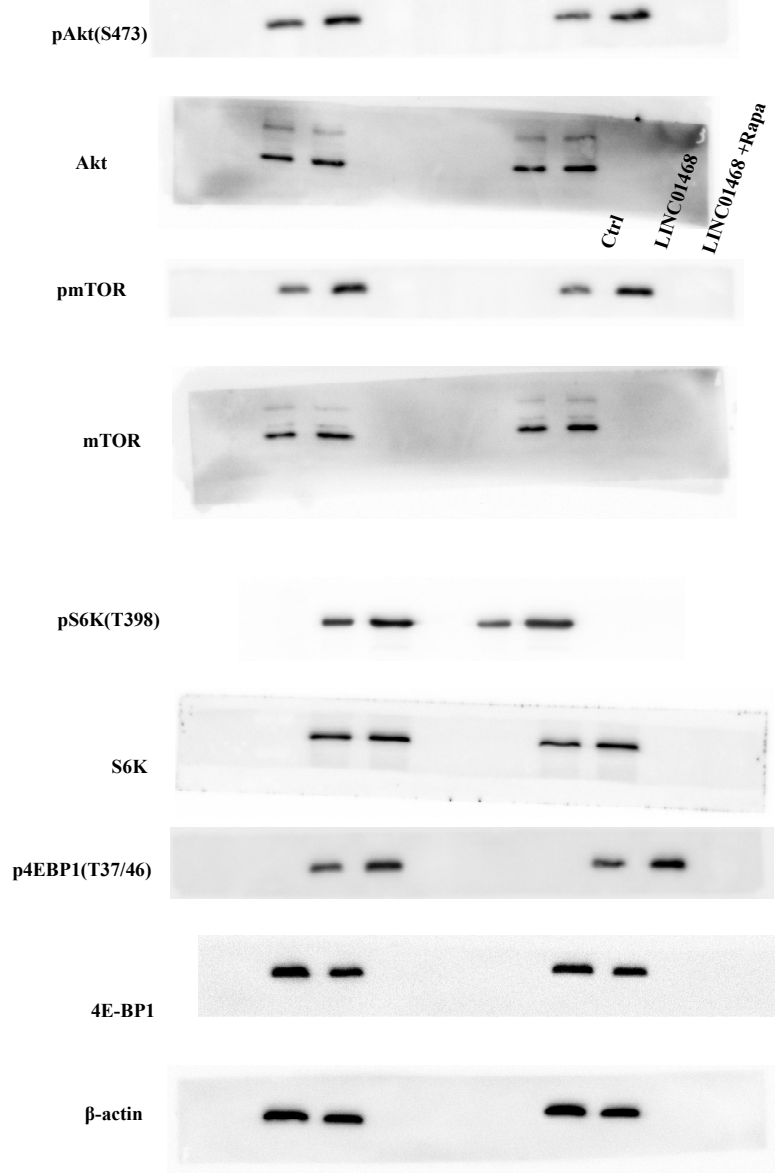

Huh7

**Fig3G**

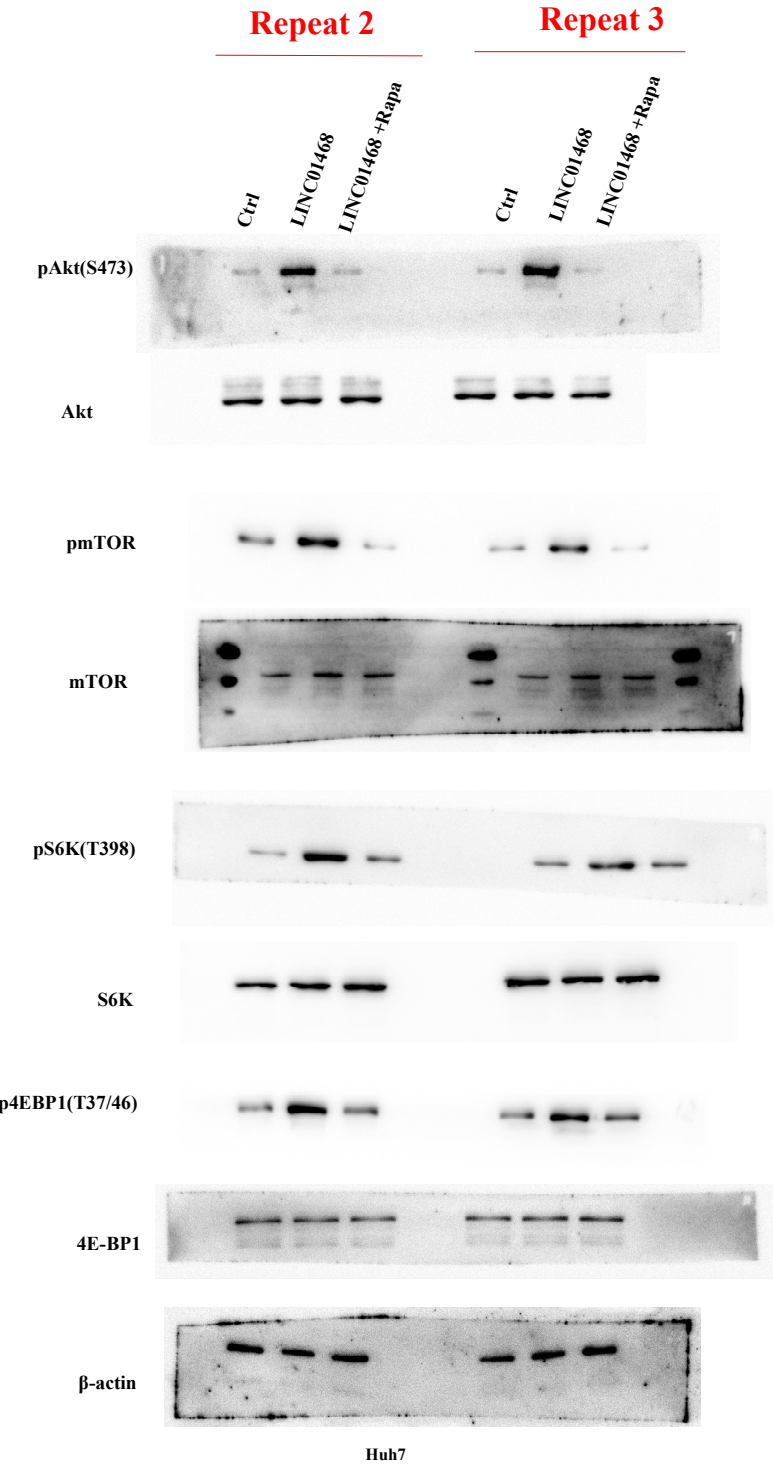



**Fig 4C**

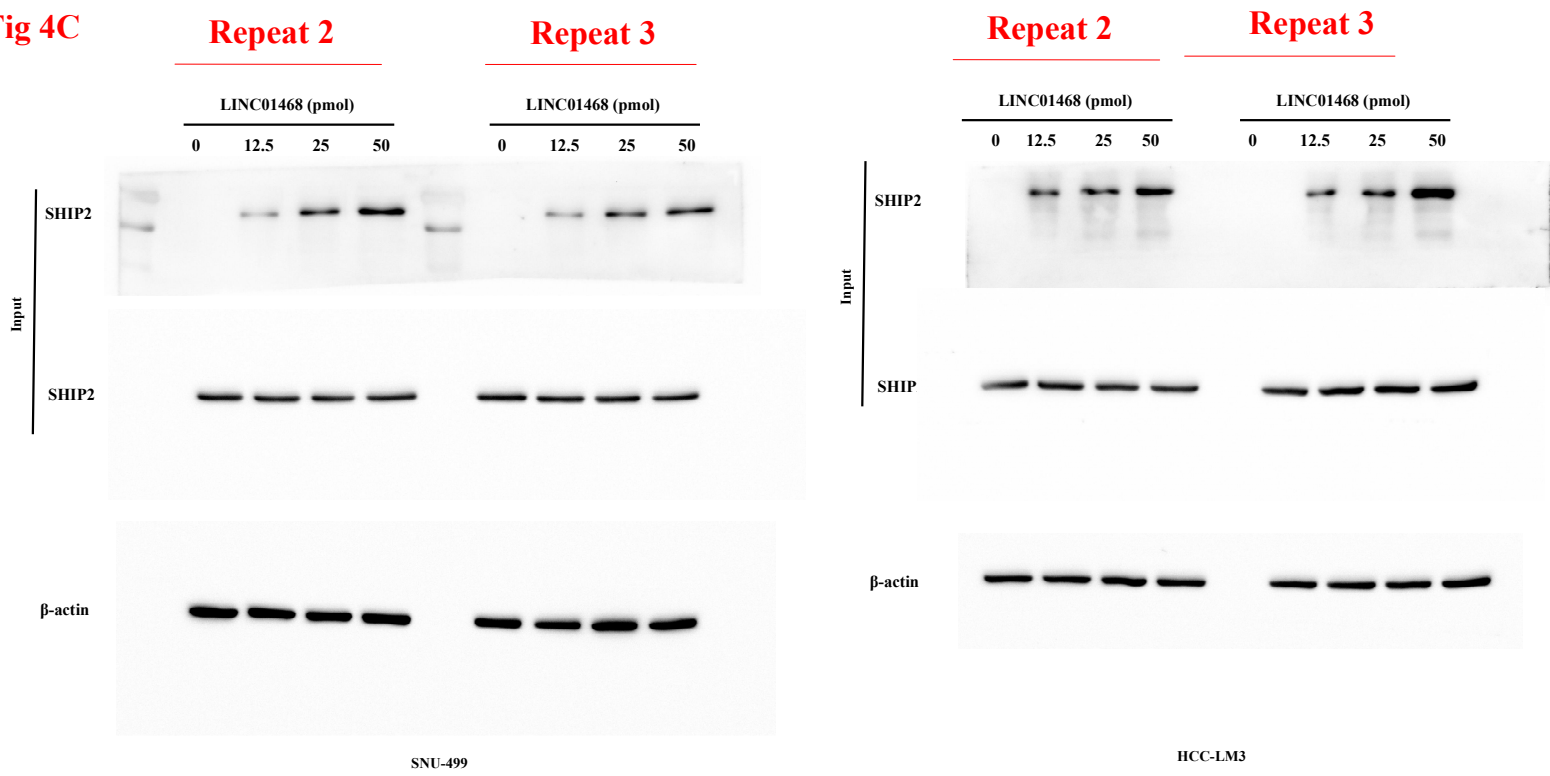

**Fig 4G**

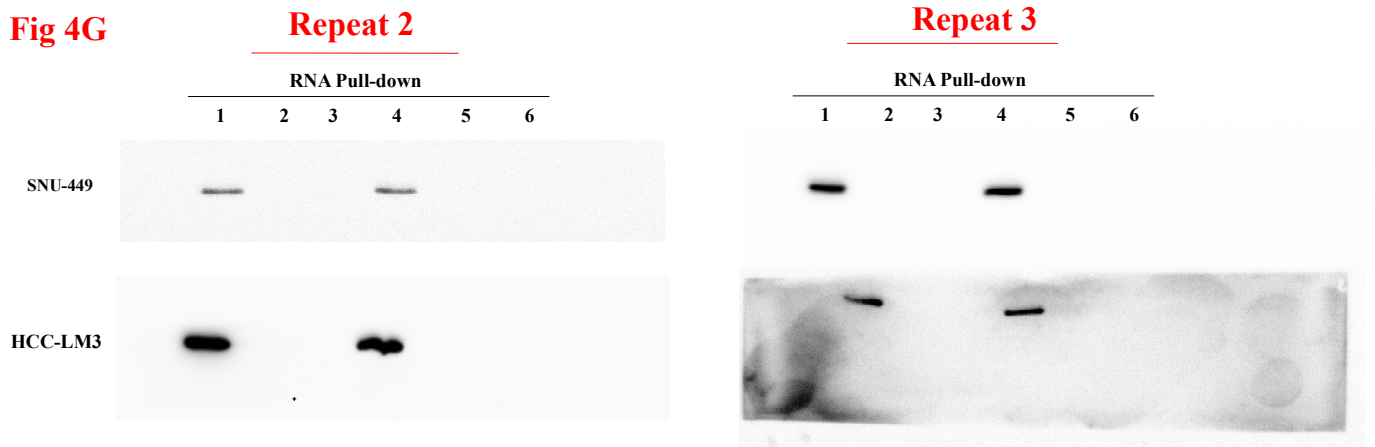

**Fig 4I**

**Repeat 2**

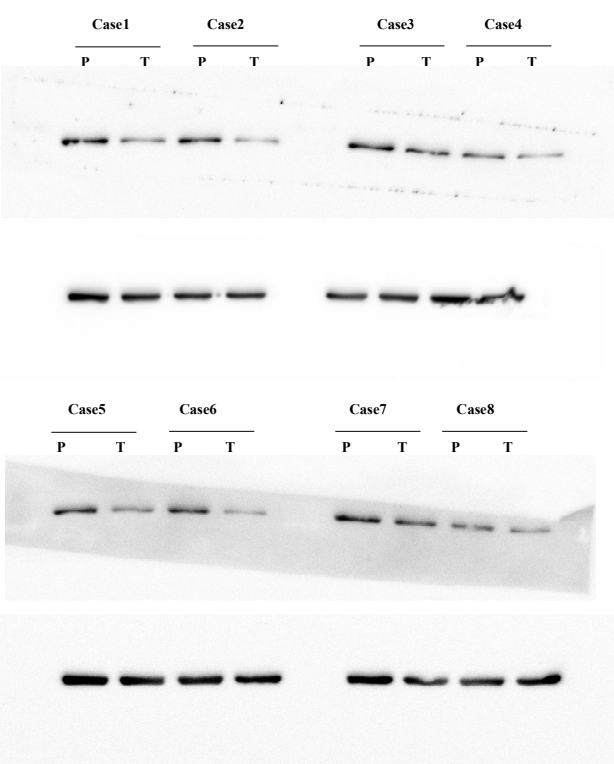

**Repeat 3**

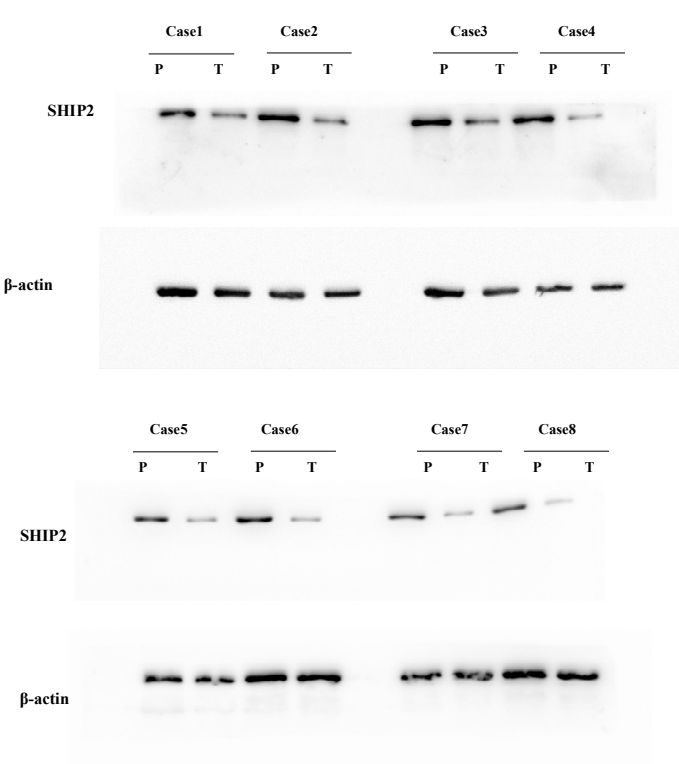

**Fig 4K**

**Repeat 2**

**Repeat 3**

| PA(mM) |     |     |     | PA(mM) |     |     |     |
|--------|-----|-----|-----|--------|-----|-----|-----|
| 0      | 0.1 | 0.2 | 0.4 | 0      | 0.1 | 0.2 | 0.4 |

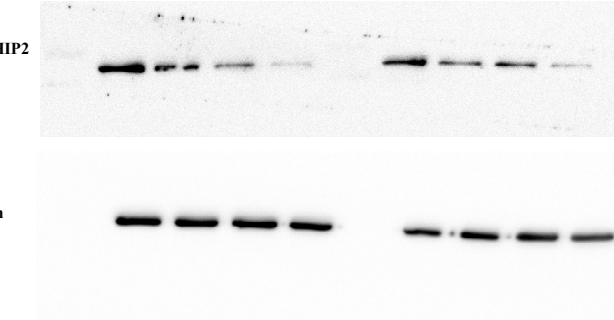

**Fig 4L**

**Repeat 2**

**Repeat 3**

| OA(mM) |     |     |     | OA(mM) |     |     |     |
|--------|-----|-----|-----|--------|-----|-----|-----|
| 0      | 0.1 | 0.2 | 0.4 | 0      | 0.1 | 0.2 | 0.4 |

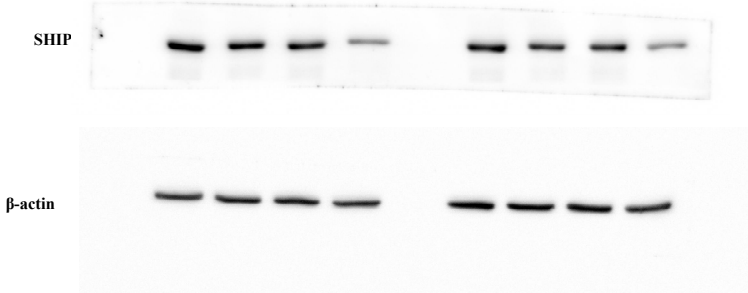

**Fig 5A**

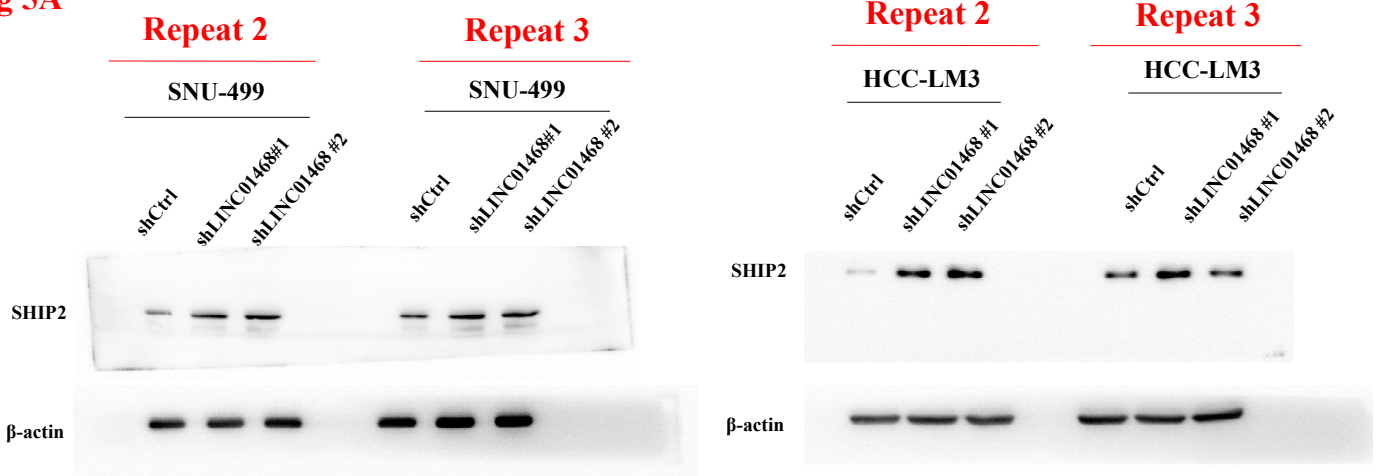

**Fig 5B**

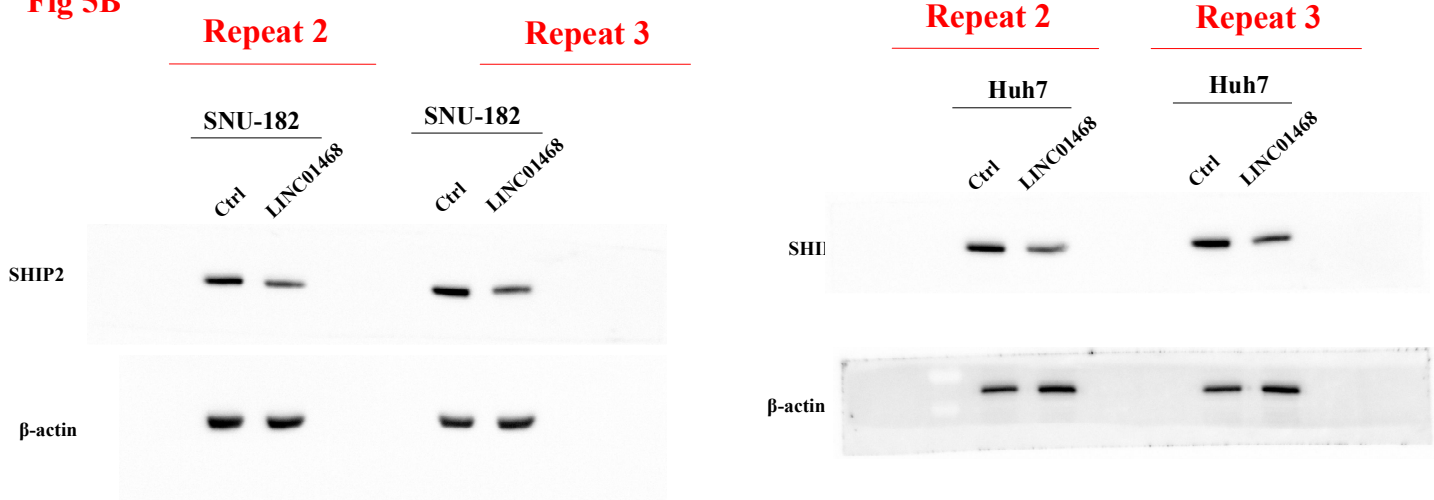

**Fig 5D**

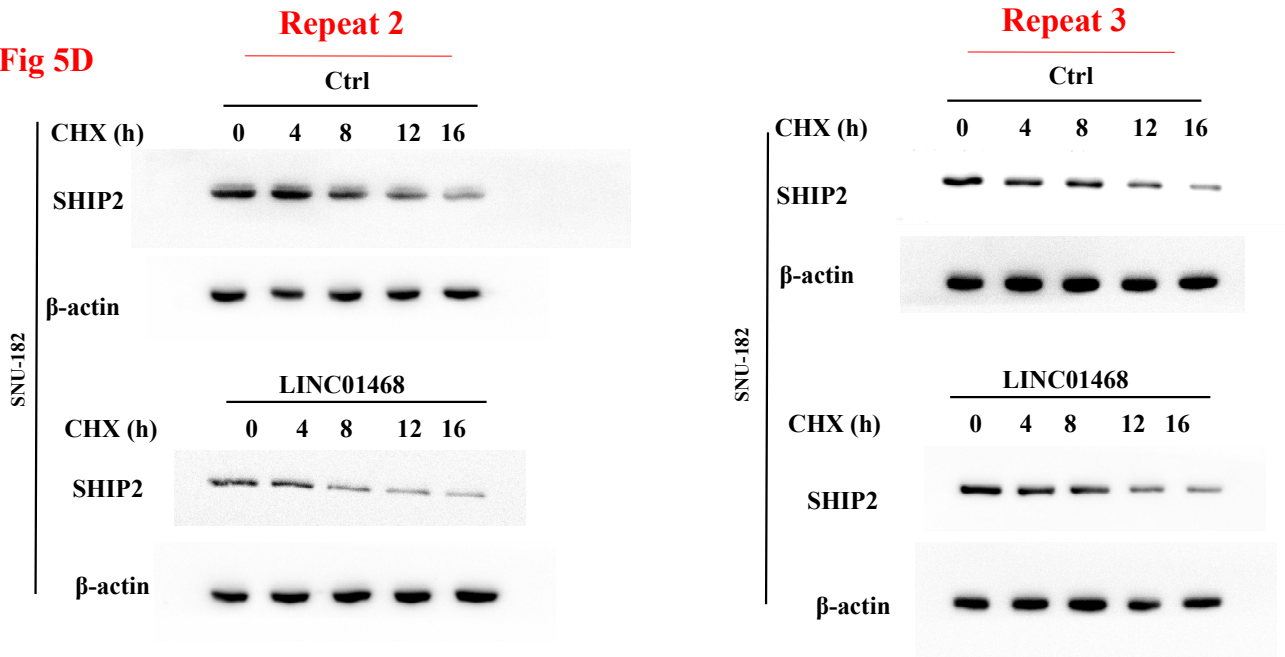

**Fig 5E**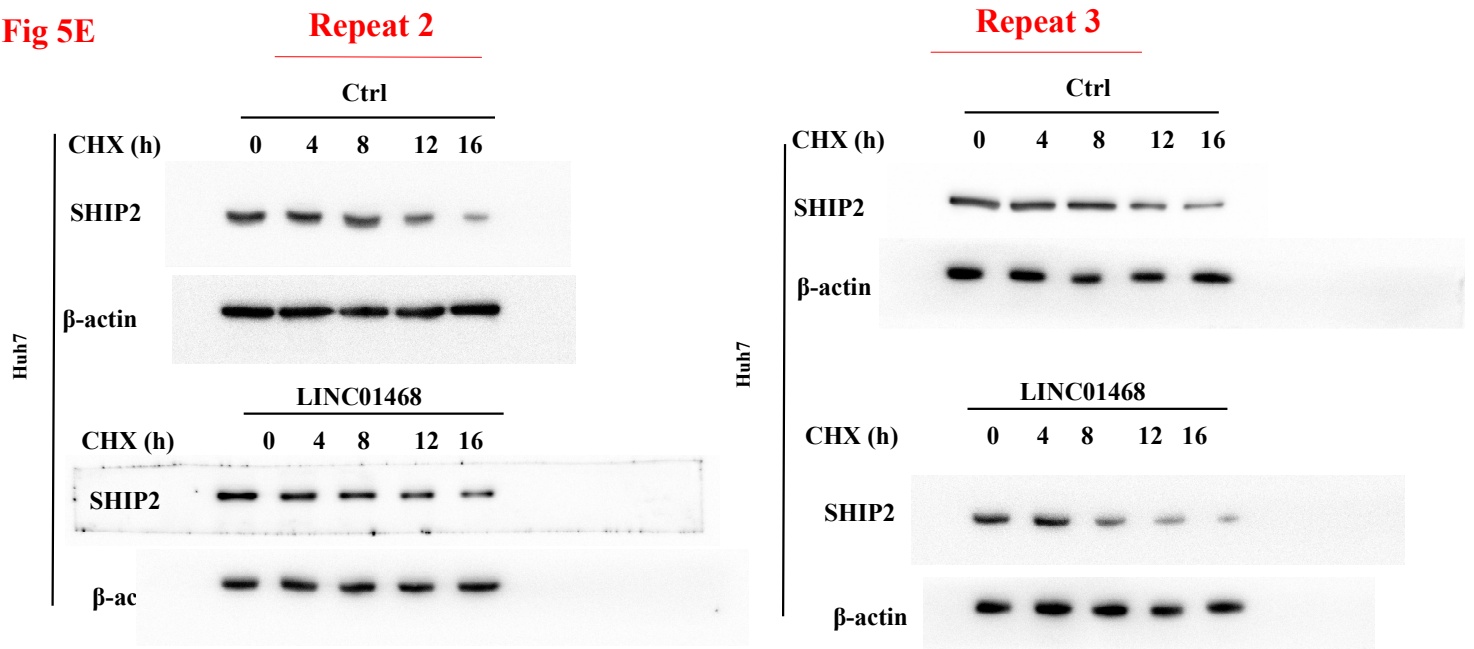**Fig 5F**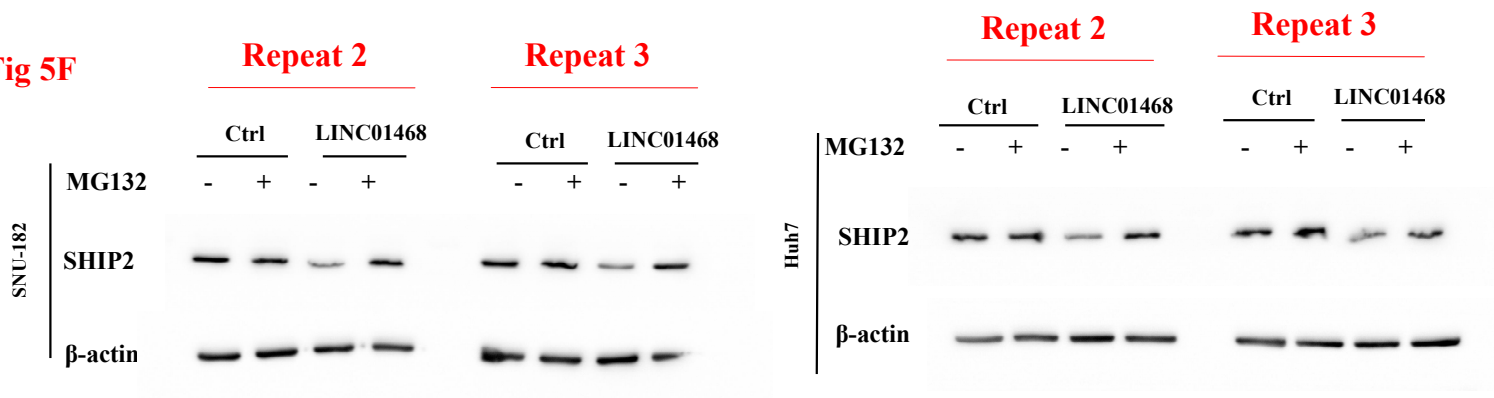

**Fig 5H**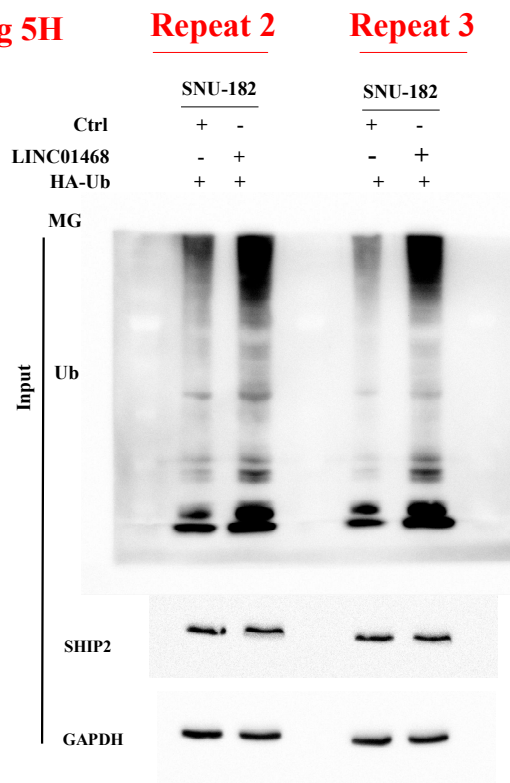**Fig 5I**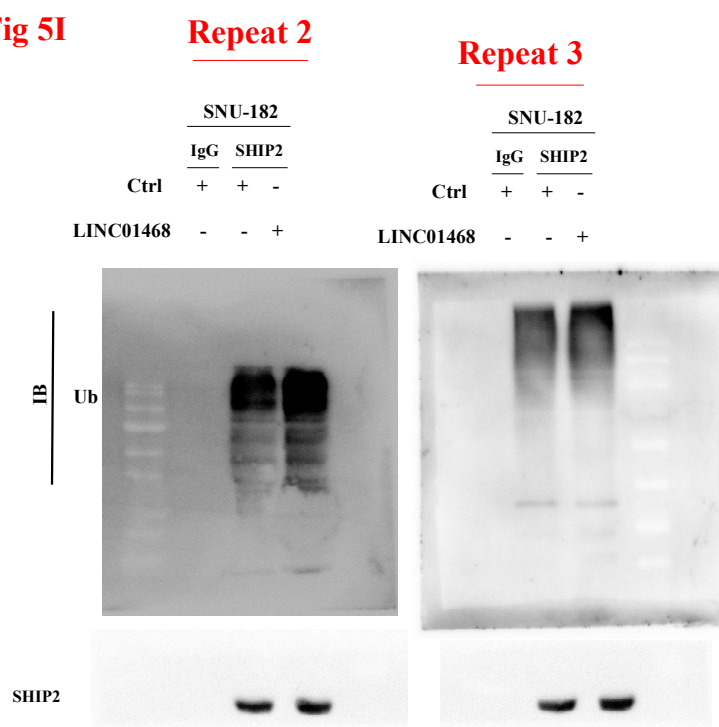**Fig 5J**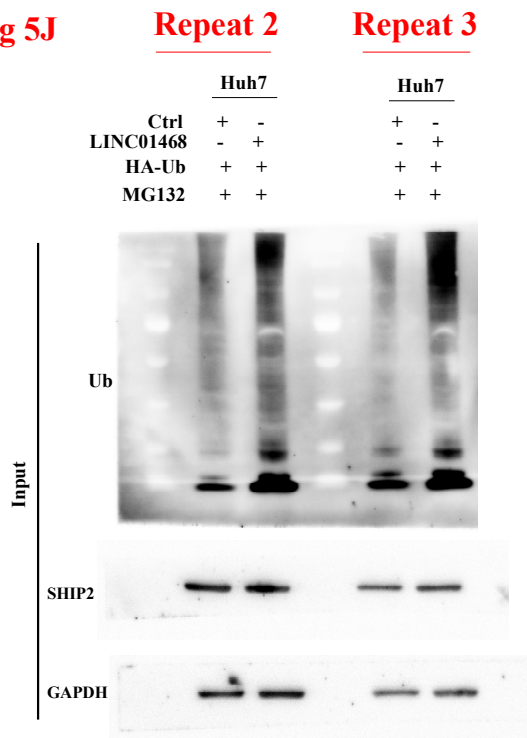**Fig 5K**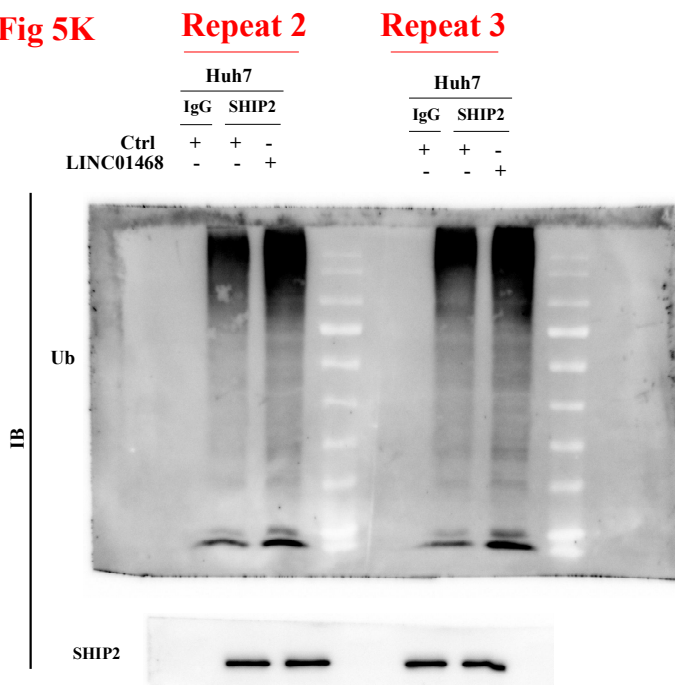

**Fig 6D****Repeat 2****Repeat 3**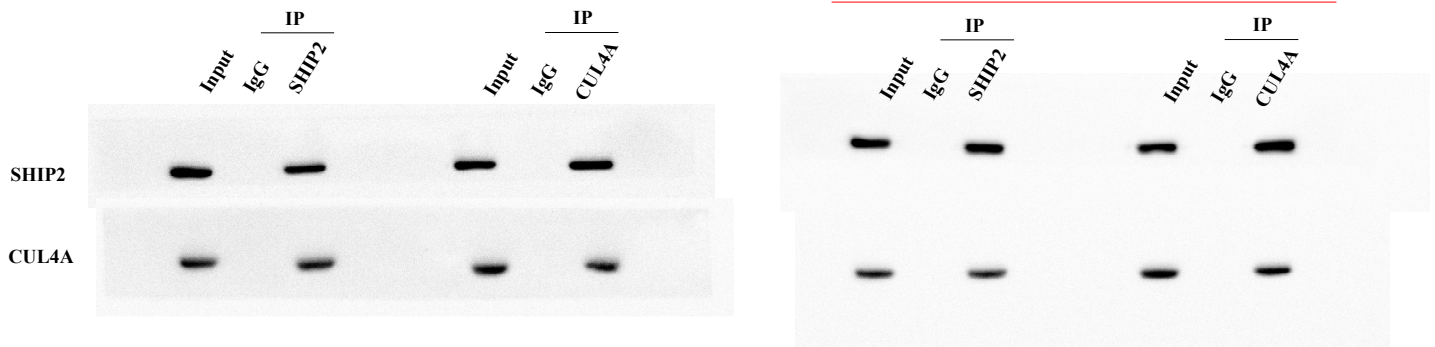**Fig 6E****Repeat 2****Repeat 3**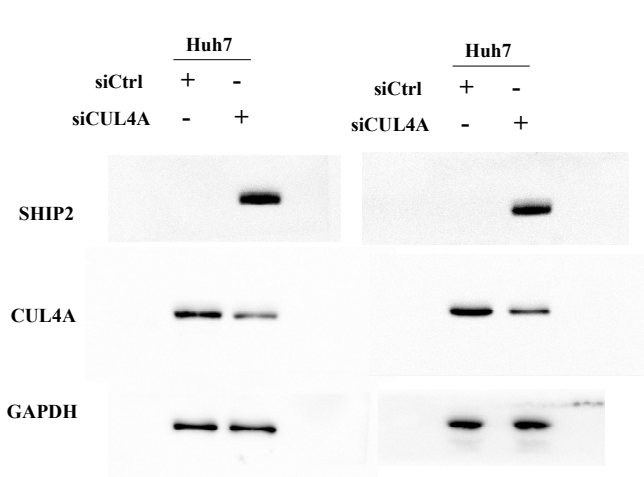**Fig 6F****Repeat 2****Repeat 3**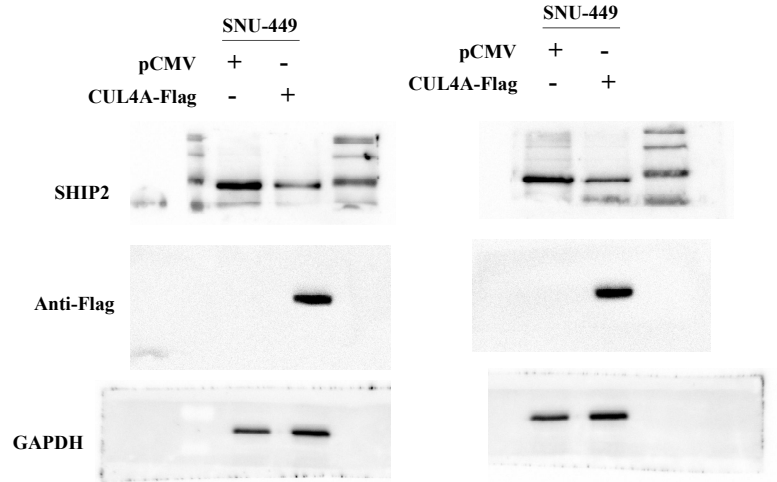

**Fig 6G****Repeat 2****Repeat 3**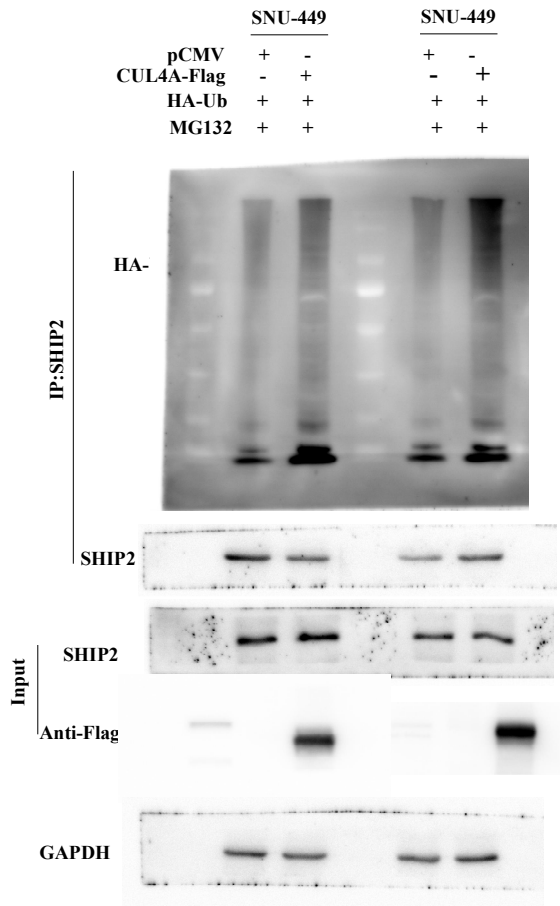**Fig 6H****Repeat 2**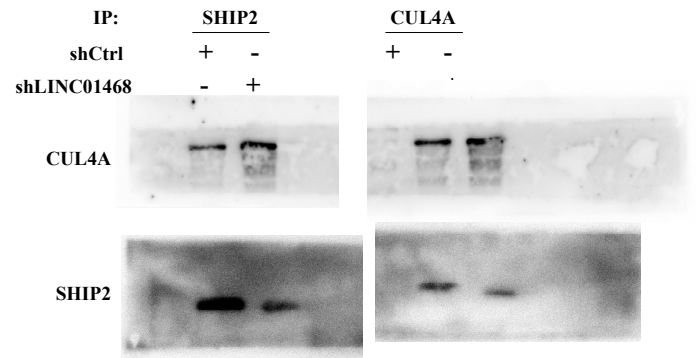**Repeat 3**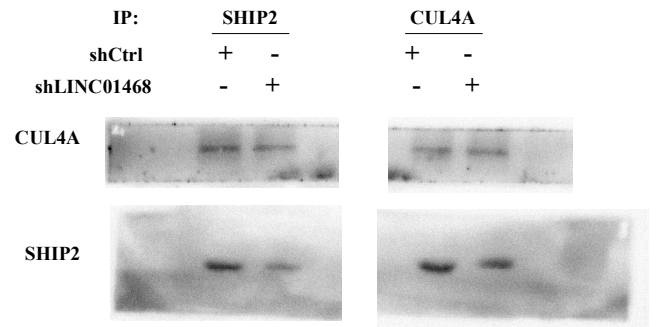**Fig 6I****Repeat 2****Repeat 3**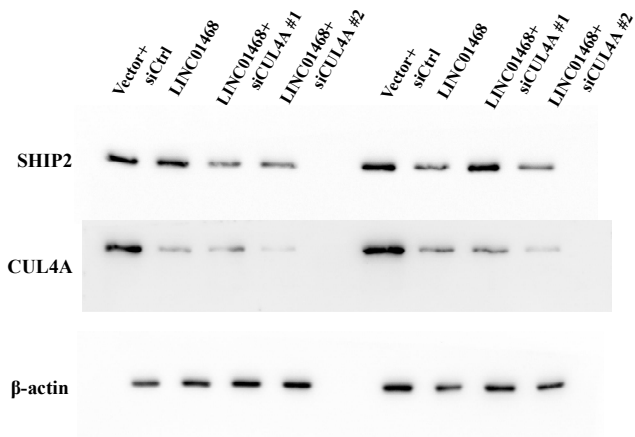

**Fig 6J****Repeat 2**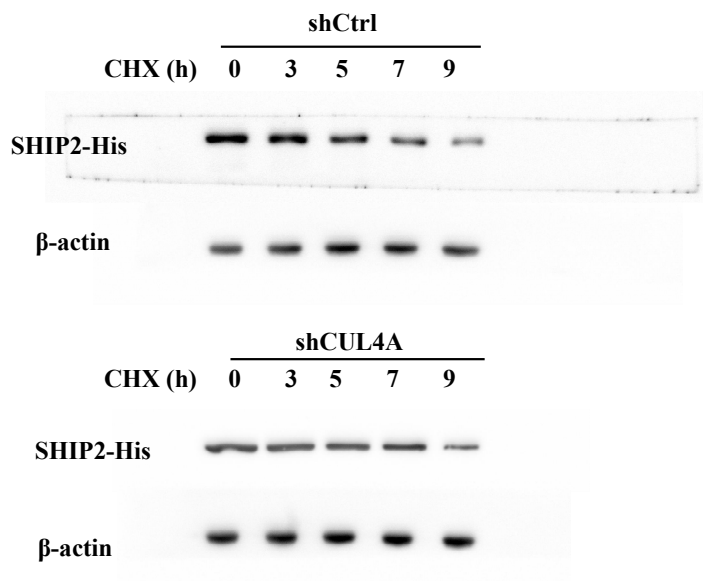**Repeat 3**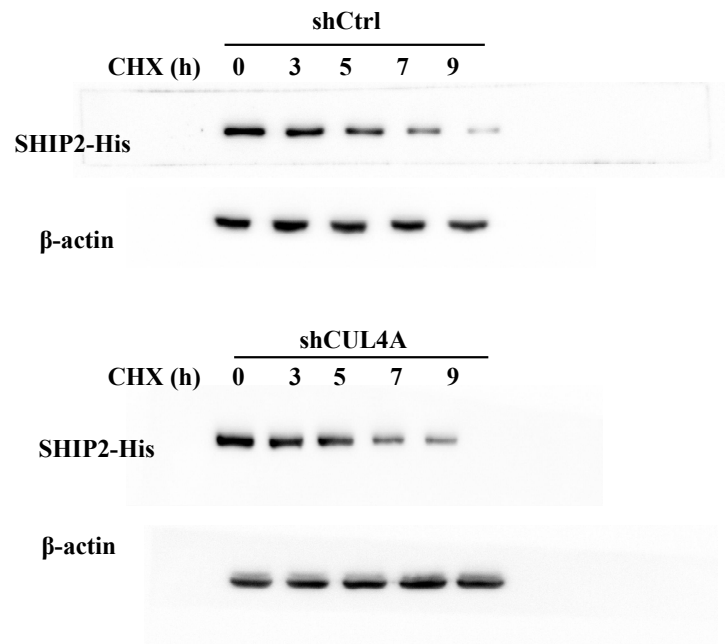**Fig6K****Repeat 2****Repeat 3**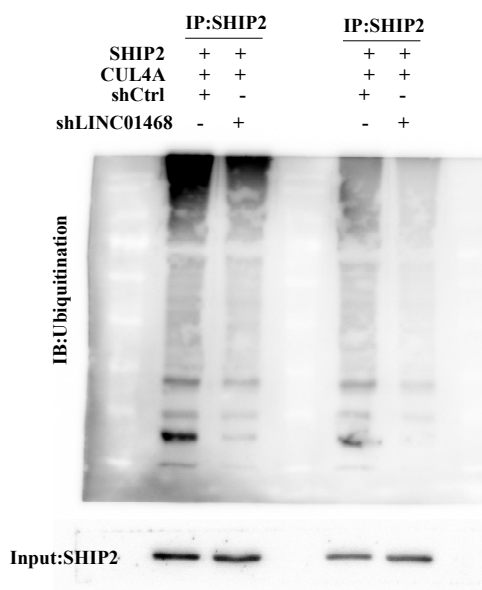**Fig6L****Repeat 2****Repeat 3**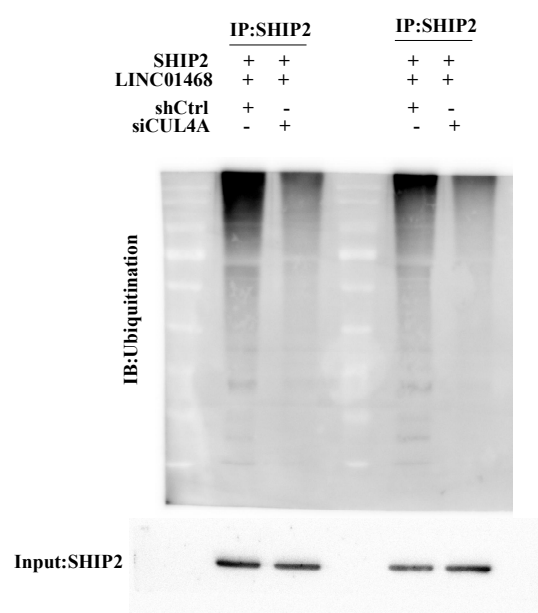



**Fig7A**

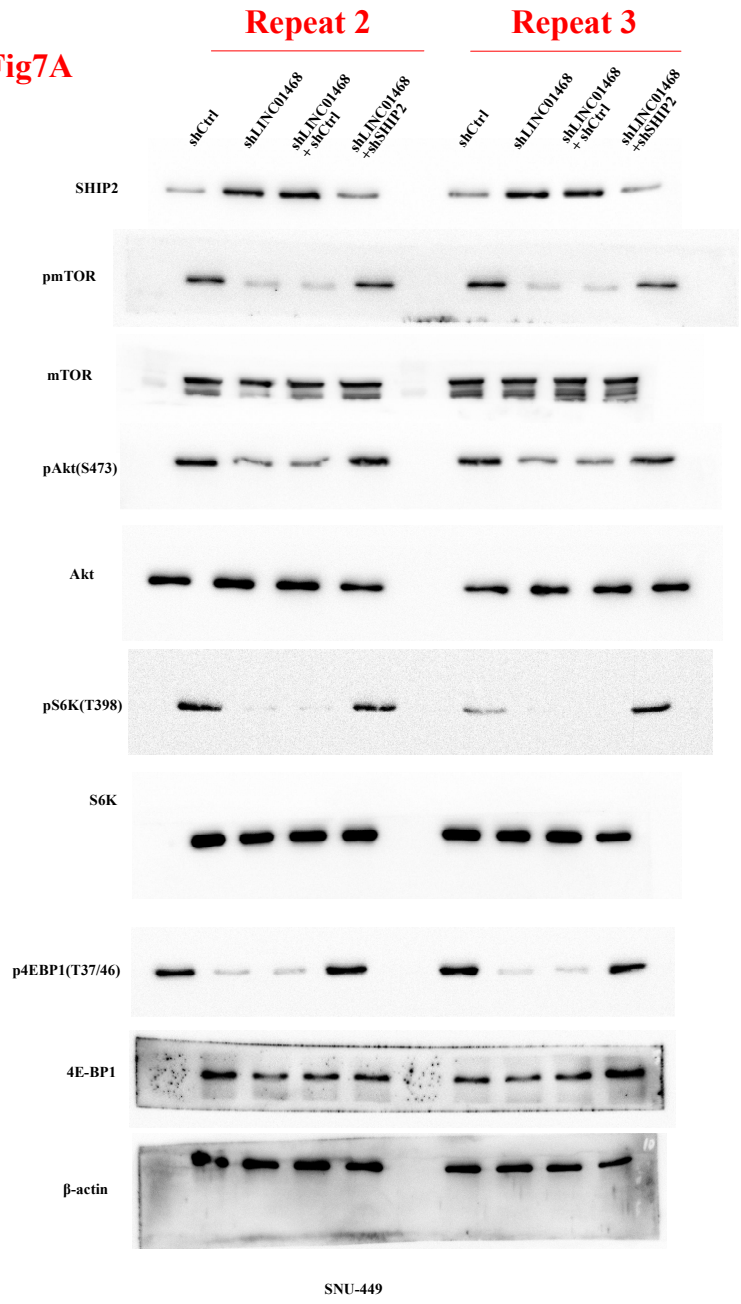

**Fig7C**

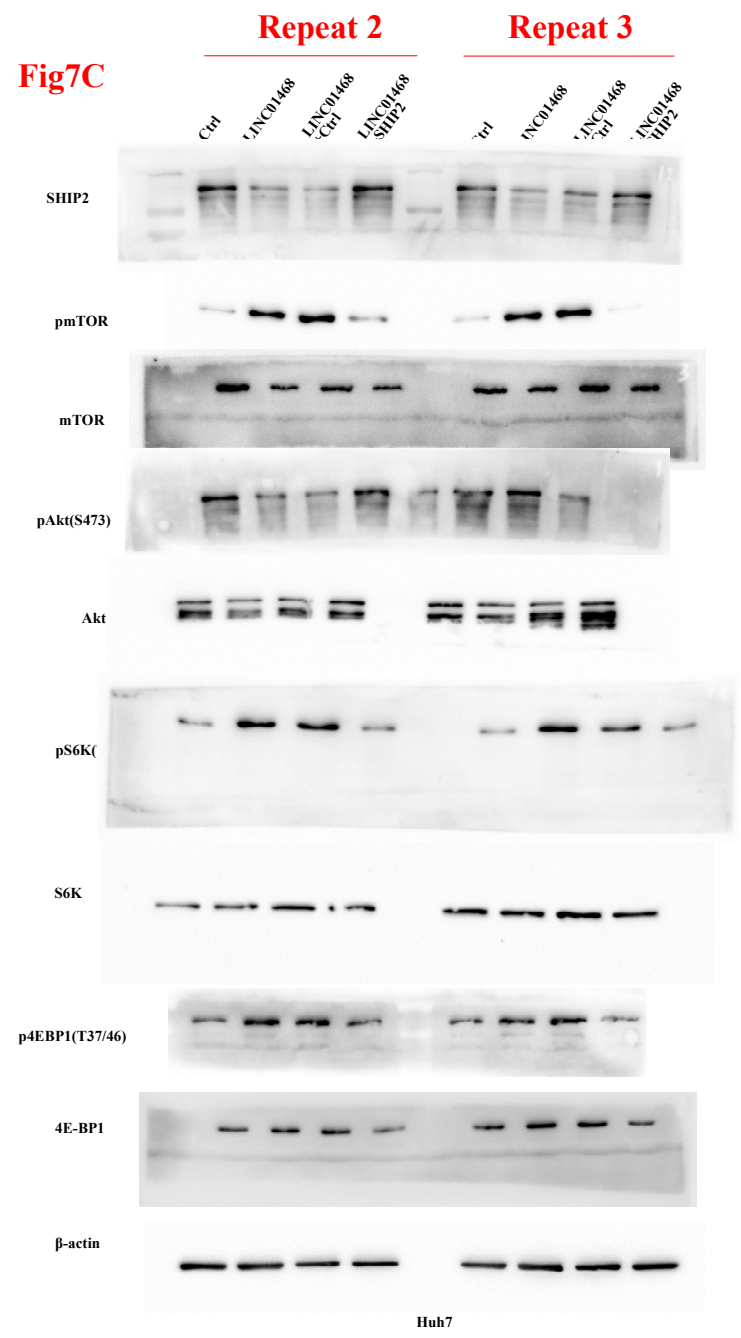

**Fig 7E**

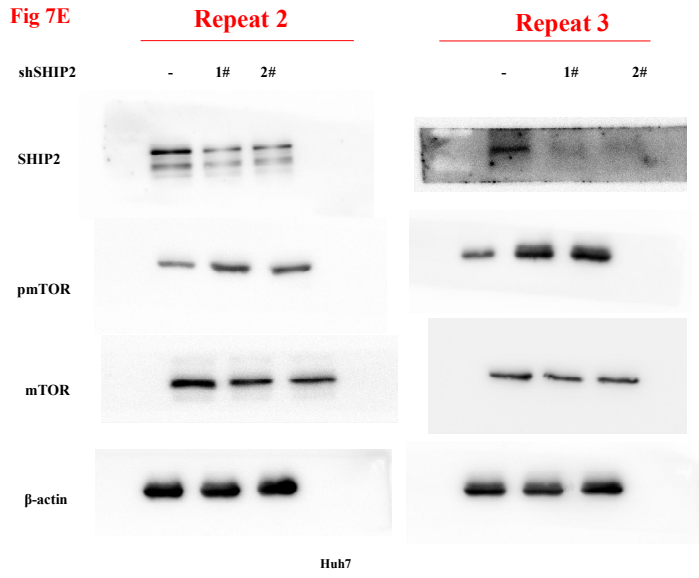

**Fig 7G**

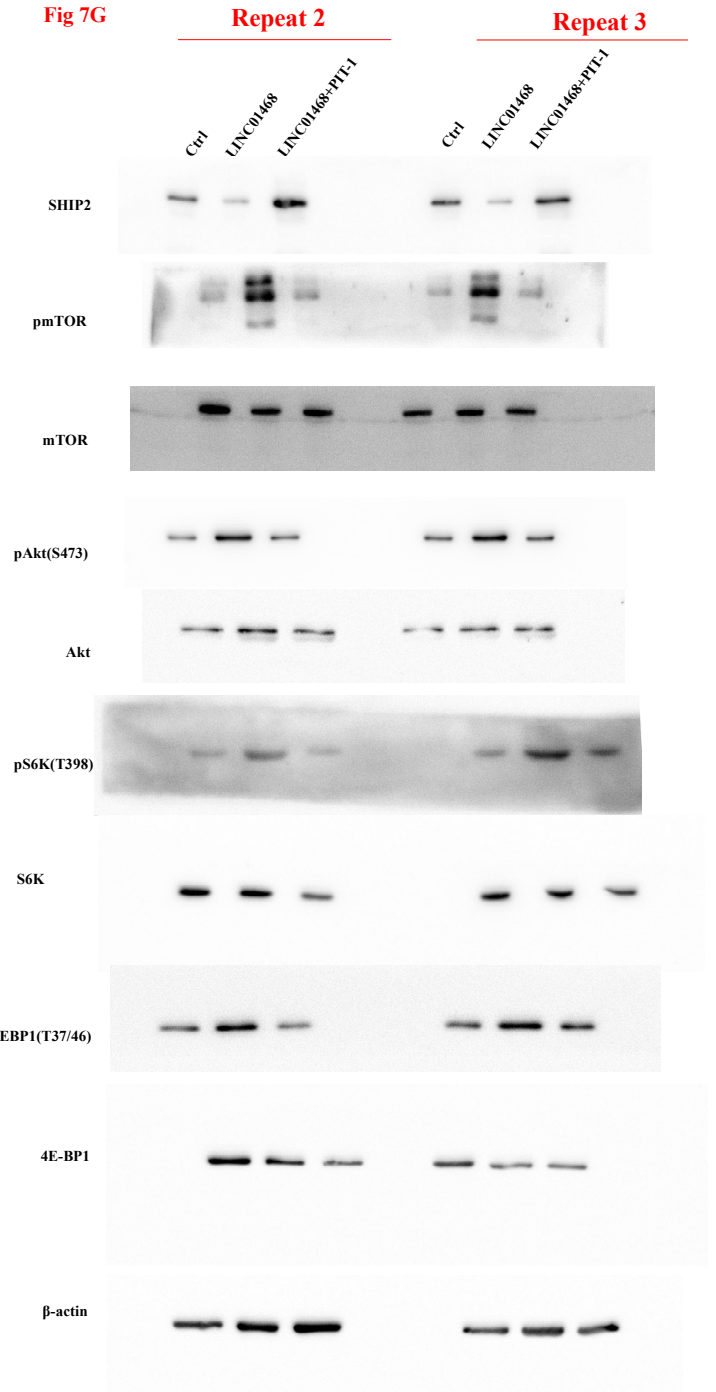

**Fig7F**

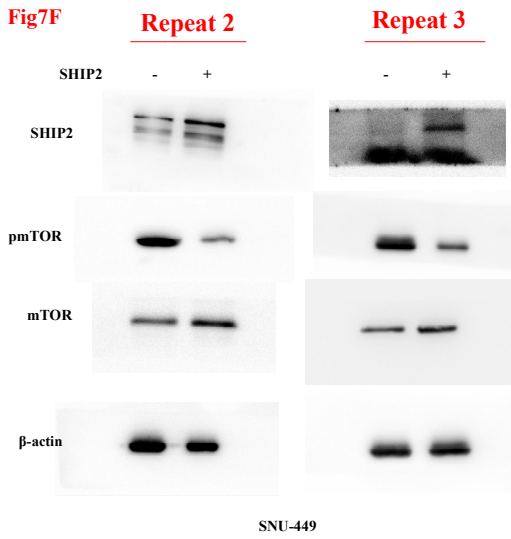

Supplement: 41420_2022_1234_MOESM4_ESM.pdf [file 41420_2022_1234_MOESM4_ESM.pdf]
